# Supplementary material for: Microbiome “Inception”: an Intestinal Cestode Shapes a Hierarchy of Microbial Communities Nested within the Host
Source: PubMed Central journal article supplement (PMC9239044; doi:10.1128/mbio.00679-22), 2022-05-03

**a**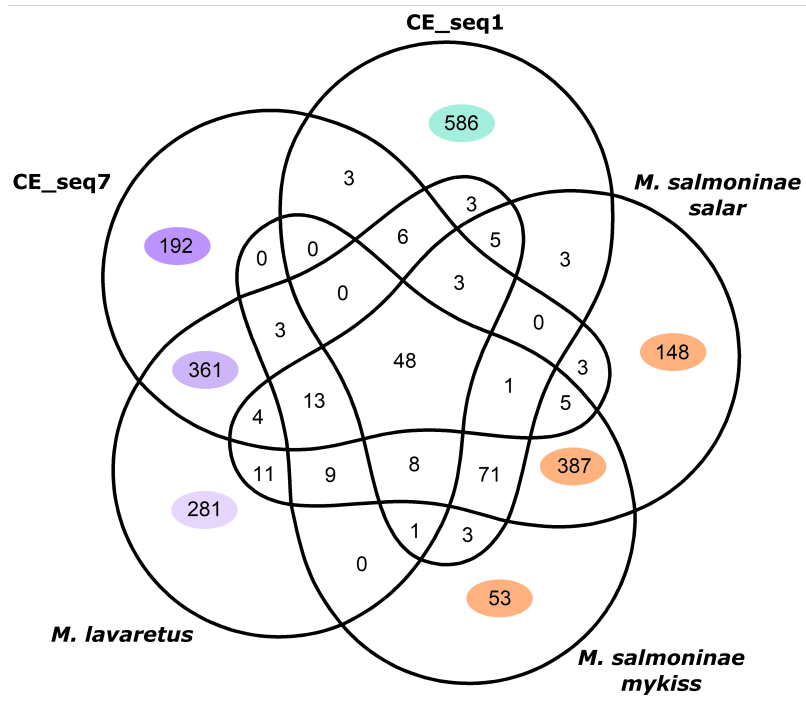**b**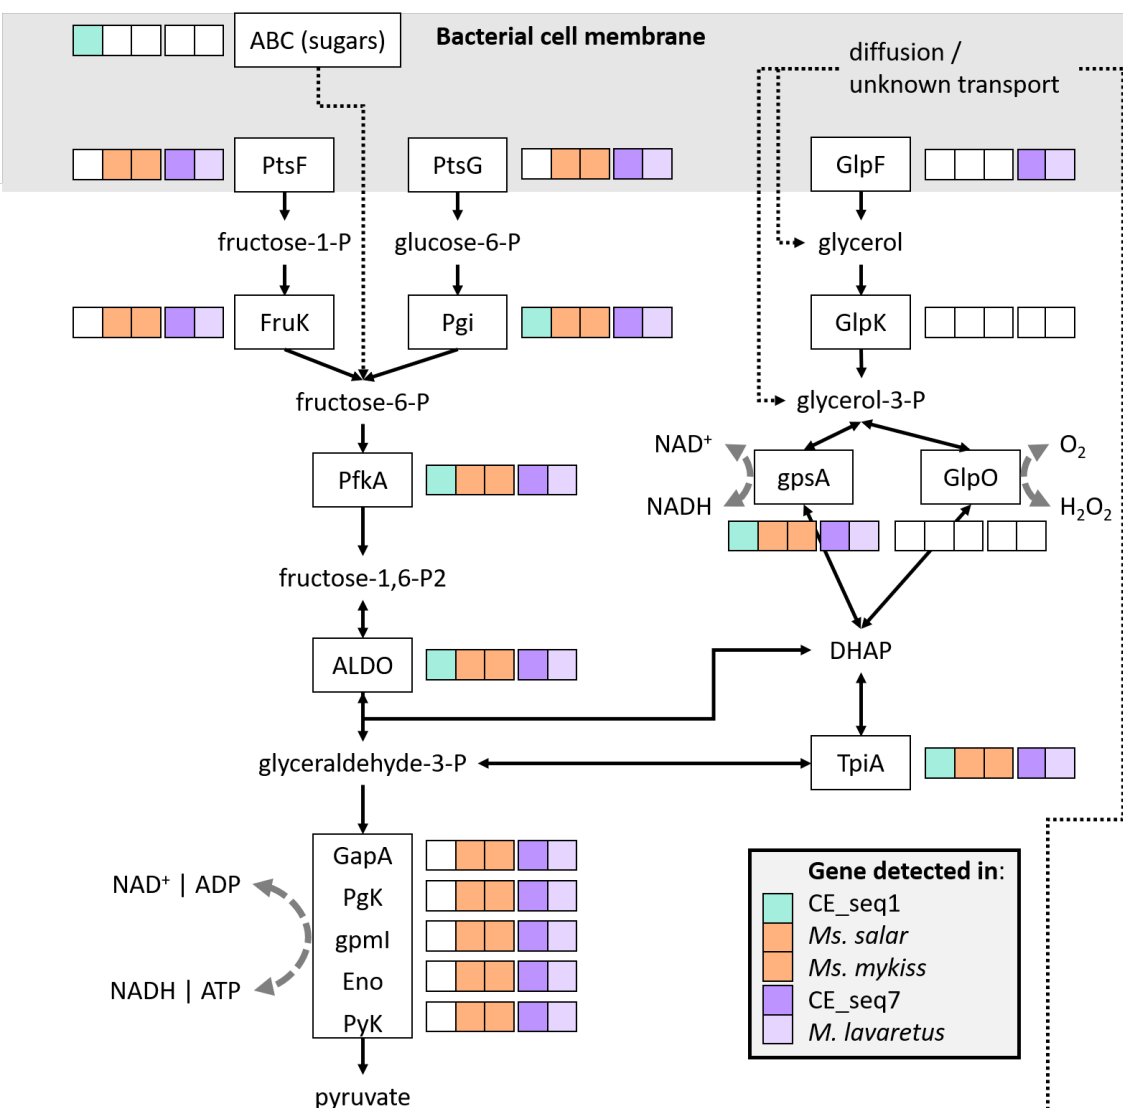

Enzyme abbreviations:

| Main pathway       | Abbreviation | COG20 function (accession)                                                              |
|--------------------|--------------|-----------------------------------------------------------------------------------------|
| sugar transport    | ABC          | ABC-type polysaccharide/polyol phosphate transport system (COG1134)                     |
| sugar transport    | PtsF         | Phosphotransferase system (PTS), fructose-specific (COG1299)                            |
| sugar transport    | PtsG         | Phosphotransferase system (PTS), glucose/maltose/N-acetylglucosamine-specific (COG1263) |
| glycolysis         | FruK         | 1-phosphofructokinase or 6-phosphofructokinase (COG1105)                                |
| glycolysis         | Pgi          | Glucose-6-phosphate isomerase (COG0166)                                                 |
| glycolysis         | PfkA         | 6-phosphofructokinase (COG0205)                                                         |
| glycolysis         | ALDO         | fructose/tagatose bisphosphate aldolase (COG0191)                                       |
| glycolysis         | GapA         | glyceraldehyde-3-phosphate dehydrogenase (COG0057)                                      |
| glycolysis         | PgK          | 3-phosphoglycerate kinase (COG0126)                                                     |
| glycolysis         | gpml         | Phosphoglycerate mutase (COG0696)                                                       |
| glycolysis         | Eno          | Enolase (COG0148)                                                                       |
| glycolysis         | PyK          | Pyruvate kinase (COG0469)                                                               |
| glycerol           | GlpF         | Glycerol uptake facilitator or related aquaporin (COG0580)                              |
| glycerol           | GlpK         | Glycerol kinase (COG0554)                                                               |
| glycerol           | gpsA         | Glycerol-3-phosphate dehydrogenase (COG0240)                                            |
| glycerol           | GlpO         | alpha-glycerophosphate oxidase (K00105)                                                 |
| glycolysis         | TpiA         | Triosephosphate isomerase (COG0149)                                                     |
| arginine deiminase | ArcC         | Carbamate kinase (COG0549)                                                              |
| arginine deiminase | ArgF         | Ornithine carbamoyltransferase (COG0078)                                                |
| arginine deiminase | ArcA         | Arginine deiminase (COG2235)                                                            |

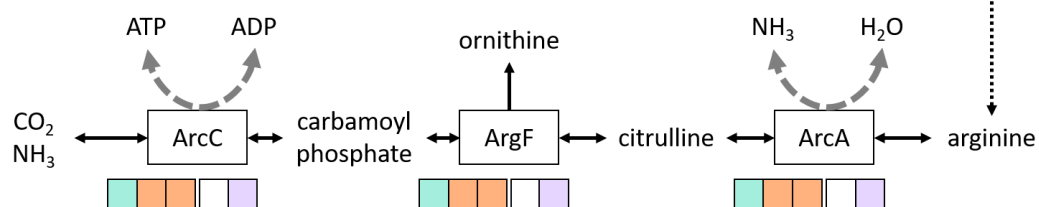

Supplement: mbio.00679-22-s0010.pdf [file mbio.00679-22-s0010.pdf]
