# Supplementary material for: Microbiome “Inception”: an Intestinal Cestode Shapes a Hierarchy of Microbial Communities Nested within the Host
Source: PubMed Central journal article supplement (PMC9239044; doi:10.1128/mbio.00679-22), 2022-05-03
Supplement: mbio.00679-22-s0002.pdf [file mbio.00679-22-s0002.pdf]

**Table S1.** Associations between ASV or genus abundance and cestode index or sample type, as produced by Maaslin2. Results with FDR < 0.25 are included and those with FDR < 0.05 are highlighted in grey.

| Variable         | Taxon          | Level/<br>model<br>type | Coeff-<br>icient | Std<br>error | N  | N<br>(non<br>0) | p-value | FDR (q-<br>value) | Genus of ASV   | Model                                                                                                                         |
|------------------|----------------|-------------------------|------------------|--------------|----|-----------------|---------|-------------------|----------------|-------------------------------------------------------------------------------------------------------------------------------|
| Cestode<br>index | Photobacterium | linear                  | 0.375            | 0.112        | 30 | 26              | 0.00295 | 0.144             | NA             | Genus relative abundance ~<br>cestode index + feed type + sex<br>+ size class + sampling date<br>(random effect) <sup>1</sup> |
|                  | Mycoplasma     | linear                  | -0.349           | 0.118        | 30 | 30              | 0.00706 | 0.173             | NA             |                                                                                                                               |
| Cestode<br>index | seq44          | linear                  | 0.011            | 0.003        | 30 | 4               | 0.00047 | 0.105             | Photobacterium | ASV relative abundance ~<br>cestode index + feed type + sex<br>+ size class + sampling date<br>(random effect) <sup>1</sup>   |
|                  | seq3           | linear                  | -0.205           | 0.068        | 30 | 28              | 0.00663 | 0.247             | Mycoplasma     |                                                                                                                               |
|                  | seq6           | linear                  | 0.271            | 0.082        | 30 | 24              | 0.00318 | 0.247             | Photobacterium |                                                                                                                               |
|                  | seq20          | linear                  | 0.022            | 0.007        | 30 | 10              | 0.00597 | 0.247             | Photobacterium |                                                                                                                               |
|                  | seq36          | linear                  | 0.012            | 0.004        | 30 | 7               | 0.00574 | 0.247             | Photobacterium |                                                                                                                               |
| Sample<br>type   | Photobacterium | body                    | -0.210           | 0.053        | 51 | 31              | 0.00036 | 0.006             | NA             | Genus relative abundance ~<br>sample type + fish ID (random<br>effect) + sampling date (random<br>effect) <sup>2</sup>        |
|                  | Photobacterium | wash                    | -0.120           | 0.053        | 51 | 31              | 0.02955 | 0.068             | NA             |                                                                                                                               |
|                  | Carnobacterium | wash                    | 0.259            | 0.075        | 51 | 22              | 0.00125 | 0.008             | NA             |                                                                                                                               |
|                  | Ureaplasma     | body                    | 0.020            | 0.006        | 51 | 12              | 0.00152 | 0.008             | NA             |                                                                                                                               |

| Variable       | Taxon                  | Level/<br>model<br>type | Coeff-<br>icient | Std<br>error | N  | N<br>(non<br>0) | p-value | FDR (q-<br>value) | Genus of ASV   | Model                                                                                                   |
|----------------|------------------------|-------------------------|------------------|--------------|----|-----------------|---------|-------------------|----------------|---------------------------------------------------------------------------------------------------------|
|                | Mycoplasmataceae<br>sp | body                    | 0.070            | 0.024        | 51 | 16              | 0.00561 | 0.022             | NA             |                                                                                                         |
|                | Mycoplasma             | body                    | 0.235            | 0.094        | 51 | 50              | 0.01637 | 0.052             | NA             |                                                                                                         |
|                | Brevinema              | body                    | -0.001           | 0.001        | 51 | 9               | 0.02352 | 0.063             | NA             |                                                                                                         |
|                | Brevinema              | wash                    | -0.001           | 0.001        | 51 | 9               | 0.11969 | 0.186             | NA             |                                                                                                         |
|                | Aliivibrio             | wash                    | -0.048           | 0.025        | 51 | 8               | 0.06647 | 0.118             | NA             |                                                                                                         |
|                | Aliivibrio             | body                    | -0.048           | 0.025        | 51 | 8               | 0.06580 | 0.118             | NA             |                                                                                                         |
|                | Lactobacillus          | body                    | -0.062           | 0.040        | 51 | 16              | 0.12818 | 0.186             | NA             |                                                                                                         |
| Sample<br>type | seq1                   | body                    | 0.646            | 0.063        | 51 | 45              | <0.0001 | <0.00001          | Mycoplasma     | ASV relative abundance ~<br>sample type + fish ID (random<br>effect) + sampling date (random<br>effect) |
|                | seq1                   | wash                    | 0.183            | 0.063        | 51 | 45              | 0.00669 | 0.024             | Mycoplasma     |                                                                                                         |
|                | seq2                   | body                    | -0.426           | 0.063        | 51 | 42              | <0.0001 | 0.000004          | Mycoplasma     |                                                                                                         |
|                | seq2                   | wash                    | -0.190           | 0.063        | 51 | 42              | 0.00529 | 0.023             | Mycoplasma     |                                                                                                         |
|                | seq3                   | body                    | -0.185           | 0.030        | 51 | 35              | <0.0001 | 0.00001           | Mycoplasma     |                                                                                                         |
|                | seq3                   | wash                    | -0.079           | 0.030        | 51 | 35              | 0.01330 | 0.045             | Mycoplasma     |                                                                                                         |
|                | seq5                   | wash                    | 0.228            | 0.067        | 51 | 22              | 0.00137 | 0.010             | Carnobacterium |                                                                                                         |

| Variable | Taxon | Level/<br>model<br>type | Coeff-<br>icient | Std<br>error | N  | N<br>(non<br>0) | p-value | FDR (q-<br>value) | Genus of ASV     | Model |
|----------|-------|-------------------------|------------------|--------------|----|-----------------|---------|-------------------|------------------|-------|
|          | seq6  | body                    | -0.154           | 0.038        | 51 | 30              | 0.00029 | 0.004             | Photobacterium   |       |
|          | seq6  | wash                    | -0.087           | 0.038        | 51 | 30              | 0.02931 | 0.083             | Photobacterium   |       |
|          | seq7  | body                    | 0.104            | 0.026        | 51 | 30              | 0.00034 | 0.004             | Mycoplasma       |       |
|          | seq8  | wash                    | -0.045           | 0.024        | 51 | 8               | 0.06497 | 0.135             | Aliivibrio       |       |
|          | seq8  | body                    | -0.046           | 0.024        | 51 | 8               | 0.06428 | 0.135             | Aliivibrio       |       |
|          | seq9  | body                    | 0.070            | 0.024        | 51 | 16              | 0.00561 | 0.023             | Mycoplasmataceae |       |
|          | seq10 | body                    | 0.060            | 0.031        | 51 | 9               | 0.06351 | 0.135             | Mycoplasma       |       |
|          | seq15 | wash                    | 0.018            | 0.009        | 51 | 6               | 0.06062 | 0.135             | Carnobacterium   |       |
|          | seq16 | body                    | -0.016           | 0.005        | 51 | 15              | 0.00604 | 0.023             | Photobacterium   |       |
|          | seq16 | wash                    | -0.010           | 0.005        | 51 | 15              | 0.07151 | 0.143             | Photobacterium   |       |
|          | seq18 | body                    | 0.016            | 0.005        | 51 | 12              | 0.00159 | 0.010             | Mycoplasma       |       |
|          | seq19 | body                    | -0.001           | 0.001        | 51 | 9               | 0.02352 | 0.071             | Brevinema        |       |
|          | seq20 | body                    | -0.012           | 0.004        | 51 | 11              | 0.00421 | 0.021             | Photobacterium   |       |
|          | seq20 | wash                    | -0.008           | 0.004        | 51 | 11              | 0.04474 | 0.121             | Photobacterium   |       |

| Variable | Taxon | Level/<br>model<br>type | Coeff-<br>icient | Std<br>error | N  | N<br>(non<br>0) | p-value | FDR (q-<br>value) | Genus of ASV   | Model |
|----------|-------|-------------------------|------------------|--------------|----|-----------------|---------|-------------------|----------------|-------|
|          | seq21 | body                    | 0.016            | 0.005        | 51 | 8               | 0.00171 | 0.010             | Mycoplasma     |       |
|          | seq23 | body                    | 0.015            | 0.004        | 51 | 12              | 0.00151 | 0.010             | Ureaplasma     |       |
|          | seq26 | wash                    | 0.005            | 0.002        | 51 | 29              | 0.02380 | 0.071             | Mycoplasma     |       |
|          | seq29 | wash                    | 0.004            | 0.002        | 51 | 22              | 0.05087 | 0.131             | Mycoplasma     |       |
|          | seq32 | body                    | -0.008           | 0.005        | 51 | 11              | 0.10336 | 0.183             | Lactobacillus  |       |
|          | seq36 | body                    | -0.005           | 0.003        | 51 | 9               | 0.08174 | 0.152             | Photobacterium |       |
|          | seq40 | body                    | 0.005            | 0.002        | 51 | 8               | 0.00330 | 0.018             | Ureaplasma     |       |
|          | seq41 | body                    | -0.005           | 0.003        | 51 | 6               | 0.10497 | 0.183             | Lactobacillus  |       |
|          | seq43 | wash                    | -0.003           | 0.002        | 51 | 6               | 0.06519 | 0.135             | Photobacterium |       |
|          | seq43 | body                    | -0.003           | 0.002        | 51 | 6               | 0.07481 | 0.144             | Photobacterium |       |

<sup>1</sup> Cestode presence was not associated with any taxa (genus or ASV) at FDR < 0.2.

<sup>2</sup> Cestode wash and cestode body were compared to salmon gut as the base level within sampling type.
