# Supplementary material for: Microbiome “Inception”: an Intestinal Cestode Shapes a Hierarchy of Microbial Communities Nested within the Host
Source: PubMed Central journal article supplement (PMC9239044; doi:10.1128/mbio.00679-22), 2022-05-03
Supplement: mbio.00679-22-s0003.pdf [file mbio.00679-22-s0003.pdf]

**Table S2.** Statistics and ENA accessions of the three *Mycoplasma* MAGs generated from the cestode body shotgun metagenome.

|                                             | <b>CE_seq1</b> | <b>CE_seq7</b> | <b>CE_seq10</b> |
|---------------------------------------------|----------------|----------------|-----------------|
| ENA binned assembly accession               | ERZ7517636     | ERZ7517642     | ERZ7517631      |
| Total size (Kb)                             | 790.88         | 709.84         | 350.56          |
| No. of contigs                              | 318            | 301            | 228             |
| N50                                         | 3057           | 2587           | 1496            |
| GC content (%)                              | 26.18          | 28.41          | 28.26           |
| Completeness (%)                            | 77.69          | 77.98          | 38.03           |
| Contamination (%) - checkM                  | 0.77           | 2.08           | 8.05            |
| Redundancy (%) - Anvi'o                     | 0              | 5.63           | 4.23            |
| Strain heterogeneity (%)                    | 50             | 70             | 0               |
| No. of gene clusters                        | 741            | 642            | 349             |
| No. of called genes ( $\geq 1$ per cluster) | 769            | 730            | 393             |
| No. of annotated genes                      | 455            | 447            | 277             |
| <b>Mean coverage per sample</b>             |                |                |                 |
| i162E                                       | 2.86           | 2.42           | 4.96            |
| i166E                                       | 8.77           | 14.51          | 0.73            |
| i169E                                       | 2.18           | 1.3            | 0.28            |
| i343E                                       | 0.33           | 0.26           | 0.01            |
| i347E                                       | 3.51           | 1.33           | 0.09            |
| i348E                                       | 8.59           | 1.48           | 0.14            |
| i350E                                       | 6.64           | 0.87           | 0.19            |
| i361E                                       | 14.53          | 1.22           | 0.07            |
