# Supplementary material for: Microbiome “Inception”: an Intestinal Cestode Shapes a Hierarchy of Microbial Communities Nested within the Host
Source: PubMed Central journal article supplement (PMC9239044; doi:10.1128/mbio.00679-22), 2022-05-03

**a**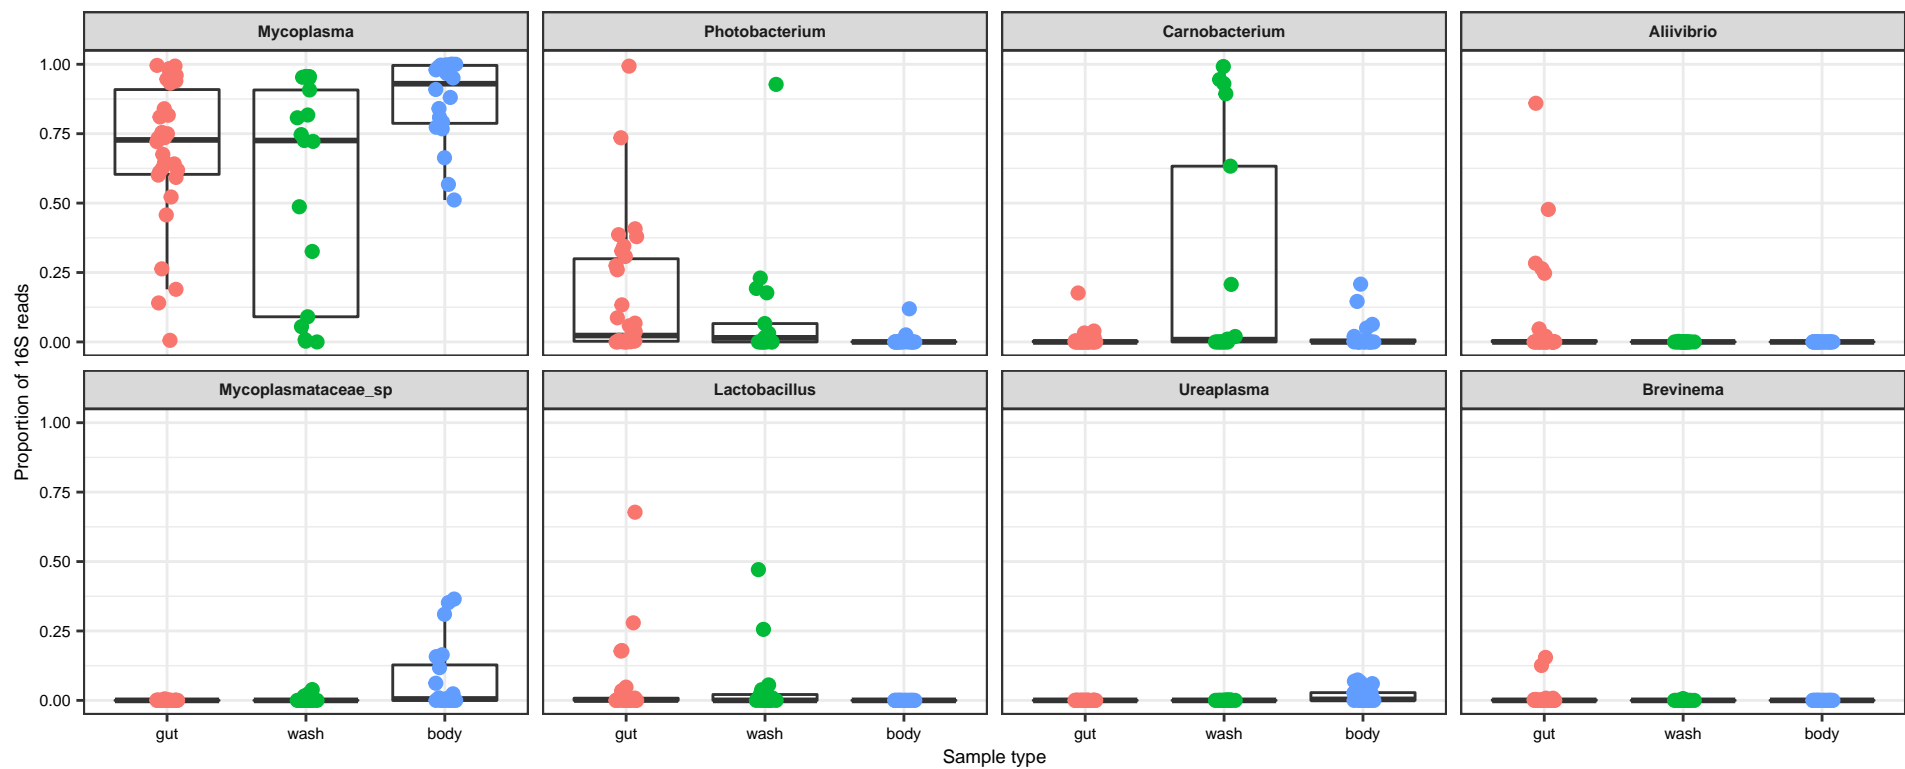**b**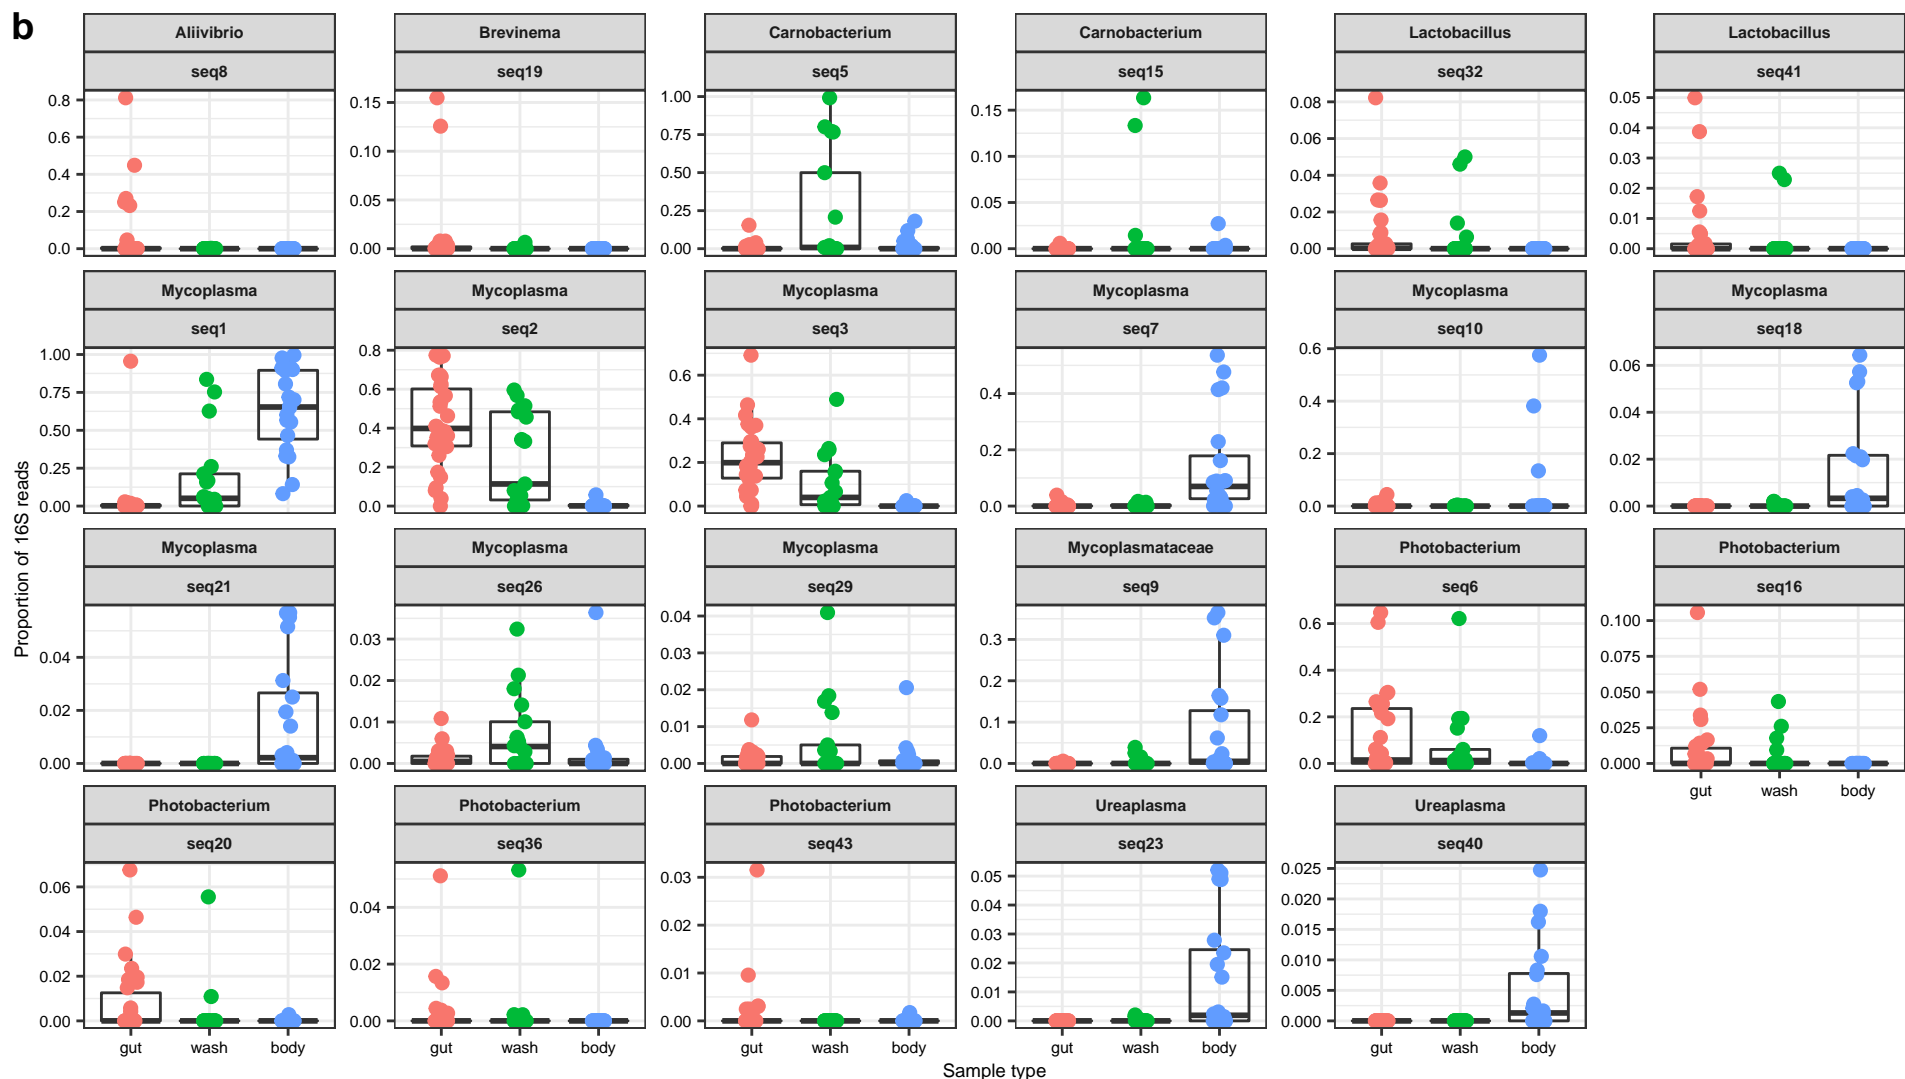

Supplement: mbio.00679-22-s0009.pdf [file mbio.00679-22-s0009.pdf]
